# Supplementary material for: Arabidopsis Actin-Depolymerizing Factor-4 Links Pathogen Perception, Defense Activation and Transcription to Cytoskeletal Dynamics
Source: PLoS Pathog. 2012 Nov 8;8(11):e1003006. doi: 10.1371/journal.ppat.1003006 (PMC3493479; doi:10.1371/journal.ppat.1003006)
Supplement: Table S1 — qRT-PCR primers used in this study. (DOCX) [file ppat.1003006.s011.docx]

**Table S1**

| **Description** | **Equation** |
| --- | --- |
| *Overlap coefficient according to Manders (R)* |  |
| *Co-localization coefficient m1* |  |
| *Co-localization coefficient m2* |  |
